# Supplementary material
Source: publisher site journal article supplement (https://www.dovepress.com/article/371067)
Supplement: Supplementary file 1 [file get_supplementary_file.php]

**Supplementary figure 1**

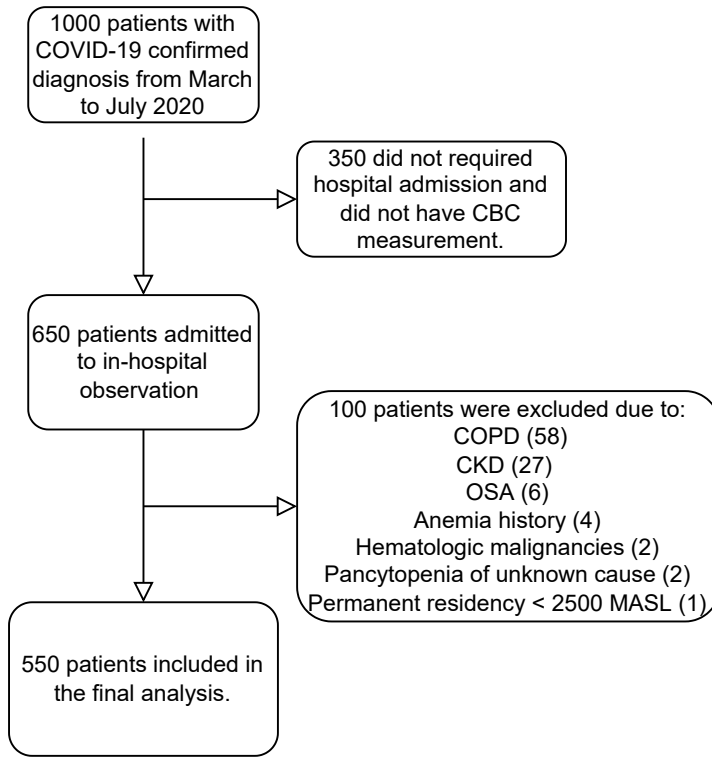

Flowchart of patient inclusion.

CBC: Complete blood count, COPD: Chronic obstructive pulmonary disease, CKD: Chronic kidney disease, OSA: Obstructive sleep apnea, MASL: Meters above sea level.
